# Supplementary material
Source: Royal Society of Chemistry journal article supplement (doi:10.1039/d6su00180g)
Supplement: d6su00180g1.pdf [file d6su00180g1.pdf]

## SUPPLEMENTARY INFORMATION

to the article

### Green metrics-guided redesign of cheese whey permeate upcycling *via* biocatalysis

Lorenza Cassano,<sup>a</sup> Lorenzo Pasotti,<sup>b</sup> Michela Casanova,<sup>b</sup> Debora Dallera,<sup>b</sup> Paolo Magni,<sup>b</sup> Andrés R. Alcántara,<sup>c</sup> Daniela Ubiali,<sup>a\*</sup> and Marina Simona Robescu<sup>a\*</sup>

---

<sup>a</sup> Department of Drug Sciences, University of Pavia, Viale Taramelli 12, I-27100, Pavia, Italy.

<sup>b</sup> Department of Electrical, Computer and Biomedical Engineering, University of Pavia, via Ferrata 5, Pavia, Italy.

<sup>c</sup> Department of Chemistry in Pharmaceutical Sciences, University Complutense di Madrid, Plaza de Ramon y Cajal s/n, Madrid, Spain.

\*Corresponding authors: [daniela.ubiali@unipv.it](mailto:daniela.ubiali@unipv.it)

[marinasimona.robescu@unipv.it](mailto:marinasimona.robescu@unipv.it)

## Table of contents

### Supplementary Figures

|                                                                                                                                     |    |
|-------------------------------------------------------------------------------------------------------------------------------------|----|
| <b>Figure S1.</b> HPLC-ELSD monitoring of the aqueous and organic phases: ternary system and biphasic system                        | 3  |
| <b>Figure S2.</b> HPLC-ELSD monitoring of organic phase purification process by catch and release strategy                          | 4  |
| <b>Figure S3.</b> HPLC-ELSD analysis of BuGal purified via flash chromatography and via L/L extraction & catch and release strategy | 5  |
| <b>Figure S4.</b> Silver nitrate precipitation test                                                                                 | 6  |
| <b>Figure S5.</b> BuGal obtained after elution with EtOH and with 1-BuOH                                                            | 7  |
| <b>Figure S6.</b> HPLC-ELSD monitoring of organic phase purification process by catch and release strategy & elution with 1-BuOH    | 8  |
| <b>Figure S7.</b> HPLC-ELSD analysis of purified via L/L extraction & catch and release strategy & elution with 1-BuOH              | 9  |
| <b>Figure S8.</b> Cell growth in the transglycosylation waste stream                                                                | 10 |

### q-<sup>1</sup>H-NMR

|                                                                                                                               |    |
|-------------------------------------------------------------------------------------------------------------------------------|----|
| <b>Figure S9.</b> <sup>1</sup> H-NMR of BuGal isolated by flash chromatography (Entry 3, Table 1)                             | 11 |
| <b>Figure S10.</b> <sup>1</sup> H-NMR of BuGal isolated by L/L extraction and elution from XAD with EtOH (Entry 4, Table 1)   | 12 |
| <b>Figure S11.</b> <sup>1</sup> H-NMR of BuGal isolated by L/L extraction and elution from XAD with EtOH (Entry 5, Table 1)   | 13 |
| <b>Figure S12.</b> <sup>1</sup> H-NMR of BuGal isolated by L/L extraction and elution from XAD with EtOH (Entry 6, Table 1)   | 14 |
| <b>Figure S13.</b> <sup>1</sup> H-NMR of BuGal isolated by L/L extraction and elution from XAD with EtOH (Entry 7, Table 1)   | 15 |
| <b>Figure S14.</b> <sup>1</sup> H-NMR of BuGal isolated by L/L extraction and elution from XAD with 1-BuOH (Entry 8, Table 1) | 16 |
| <b>Figure S15.</b> <sup>1</sup> H-NMR of BuGal isolated by L/L extraction and elution from XAD with 1-BuOH (Entry 9, Table 1) | 17 |

### Green metrics calculations

|                                     |    |
|-------------------------------------|----|
| Reaction description                | 18 |
| E-factor calculations               | 21 |
| E <sup>+</sup> -factor calculations | 31 |
| Eco-impact calculations             | 34 |

|                   |    |
|-------------------|----|
| <b>References</b> | 37 |
|-------------------|----|

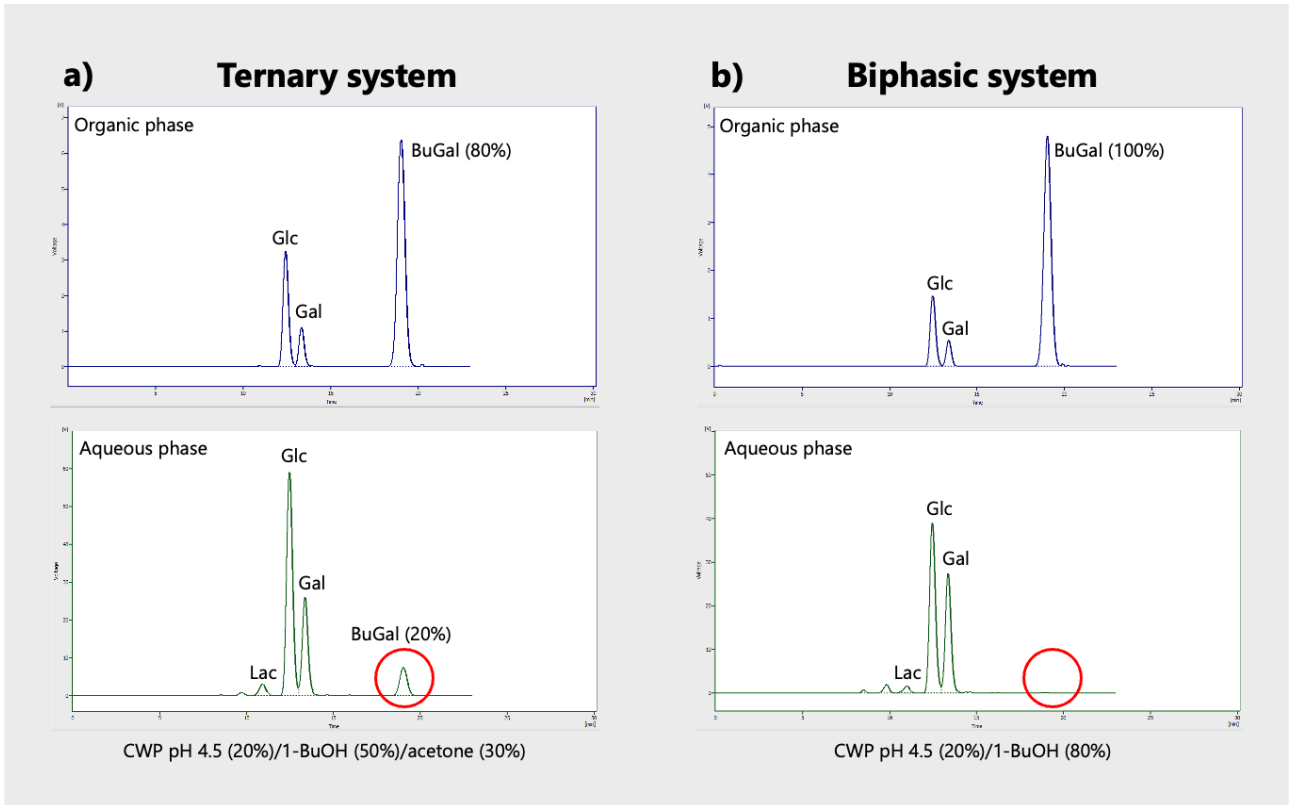

**Figure S1.** HPLC-ELSD monitoring of the aqueous and organic phases: (a) ternary system and (b) biphasic system.

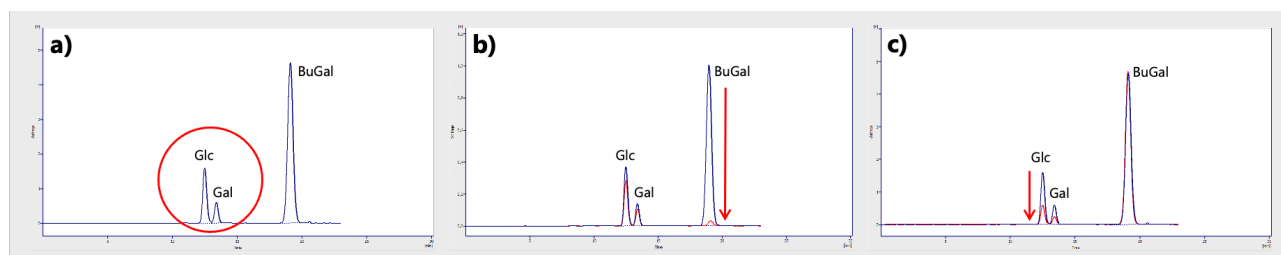

**Figure S2.** HPLC-ELSD monitoring of organic phase purification process by catch and release strategy using Amberlite® XAD4: (a) initial organic phase composition, (b) BuGal adsorption onto the resin (red chromatogram and red arrow), and (c) product desorption by EtOH (red chromatogram) overlapped with the starting solution (blue chromatogram).

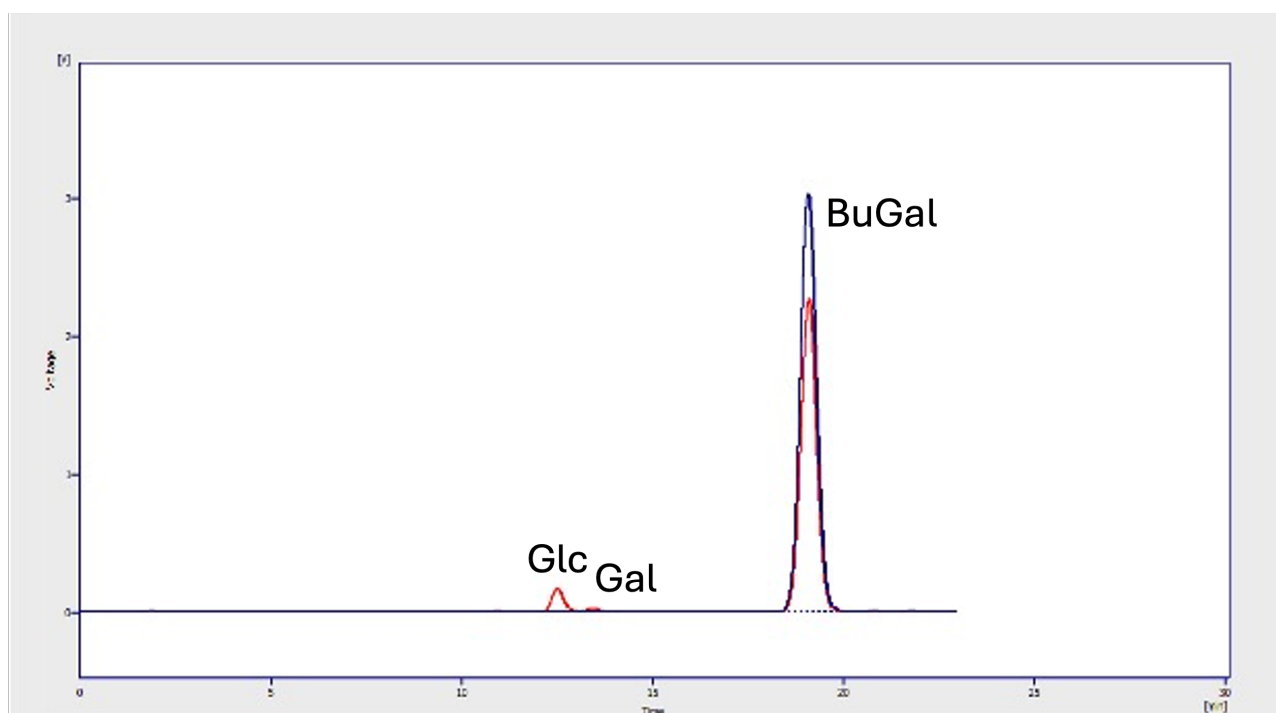

**Figure S3.** HPLC-ELSD analysis of a solution of BuGal purified via flash chromatography (10.4 mg/mL) (blue) and via L/L extraction + catch and release strategy + elution with EtOH (10.8 mg/mL) (red).

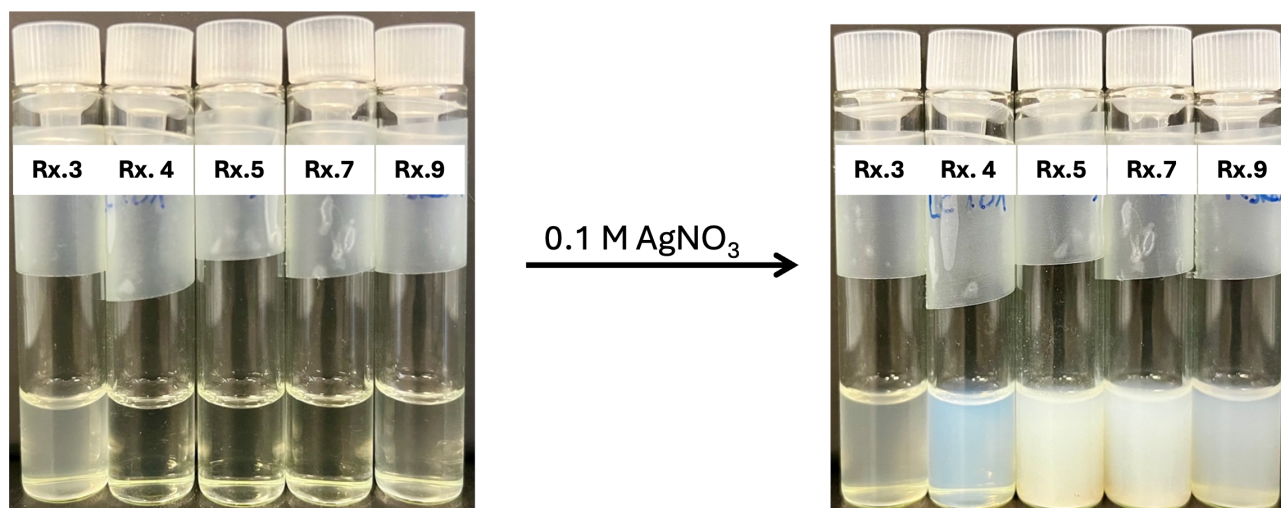

**Figure S4.** Silver nitrate precipitation test on BuGal from flash chromatography (Rx. 3), L/L extraction + catch and release strategy +elution with EtOH (Rx. 4, 5, 7) and L/L extraction + catch and release strategy+ elution with 1-BuOH (Rx. 9).

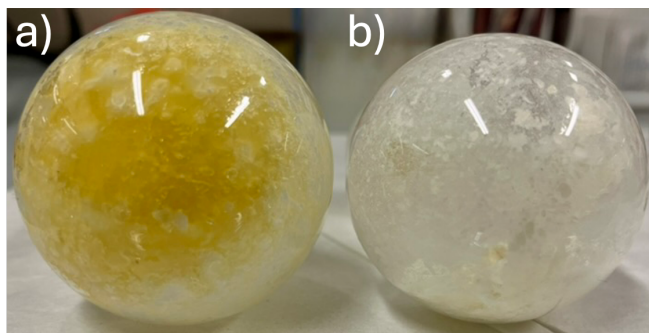

**Figure S5.** BuGal obtained via L/L extraction + catch and release strategy **(a)** after elution with EtOH and **(b)** after elution with 1-BuOH.

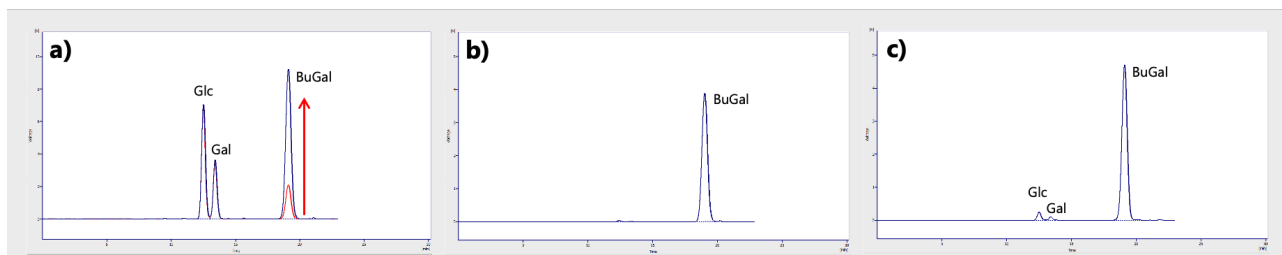

**Figure S6.** HPLC-ELSD monitoring of organic phase purification process by catch and release strategy and elution with 1-BuOH: (a) Initial water volumes (I (red) and II (blue)) from 1-BuOH elution (these volumes were discarded even if BuGal was present), (b) first 1-BuOH volume (III) and (c) final product obtained.

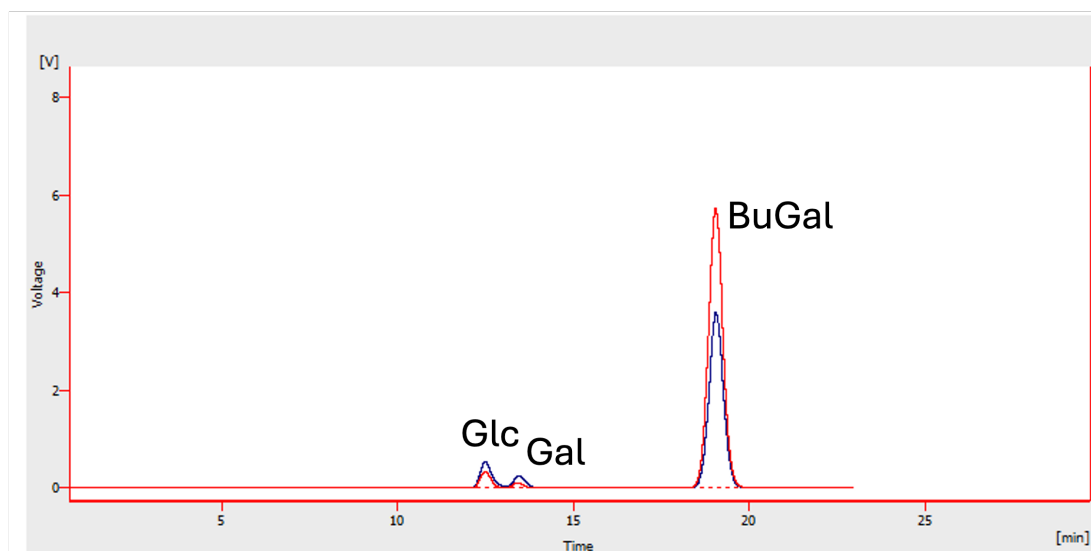

**Figure S7.** HPLC-ELSD analysis of a solution of BuGal purified via L/L extraction + catch and release strategy + elution with 1-BuOH (10.7 mg/mL) (red) and a solution of BuGal purified with L/L extraction + catch and release strategy + elution with EtOH (11.1 mg/mL) (blue).

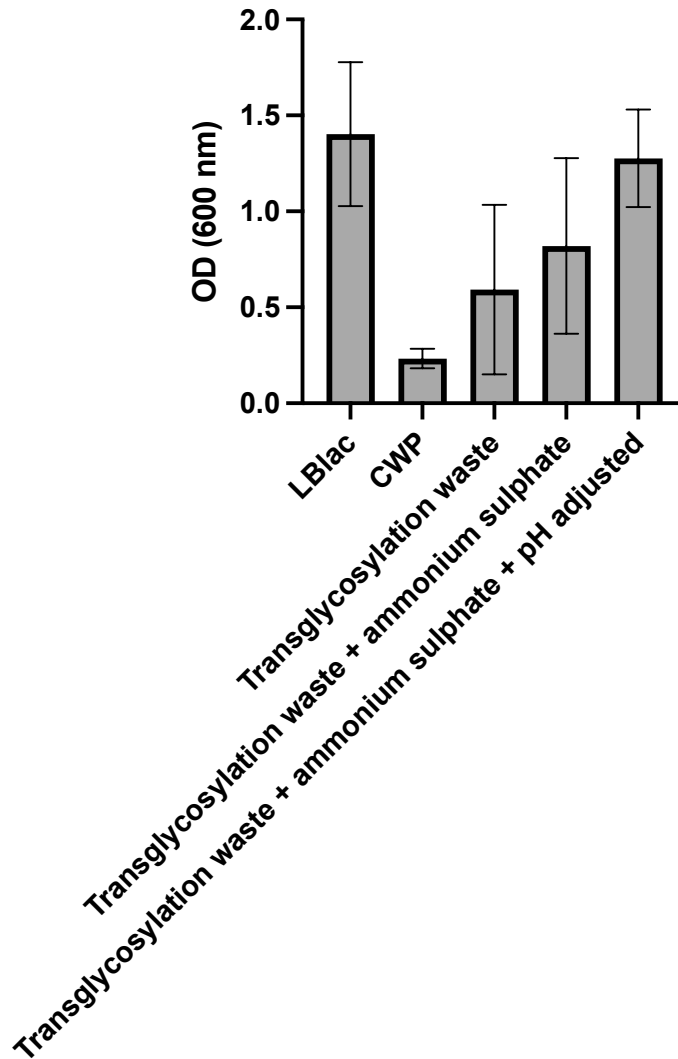

**Figure S8.** Cell growth performance in the transglycosylation waste stream. Bacterial densities (in terms of optical density at 600 nm; OD<sub>600</sub>) reached after 24-h cultivation in the indicated media. Statistical comparisons via t-test showed that the cell density reached in CWP is significantly lower than in all the other conditions, and that the cell density reached in LBlac is significantly higher than in transglycosylation waste (untreated or with ammonium sulfate added) with a p-value cutoff of 0.05. Bars correspond to the average value of at least two independent replicates, and error bars indicate standard deviations.

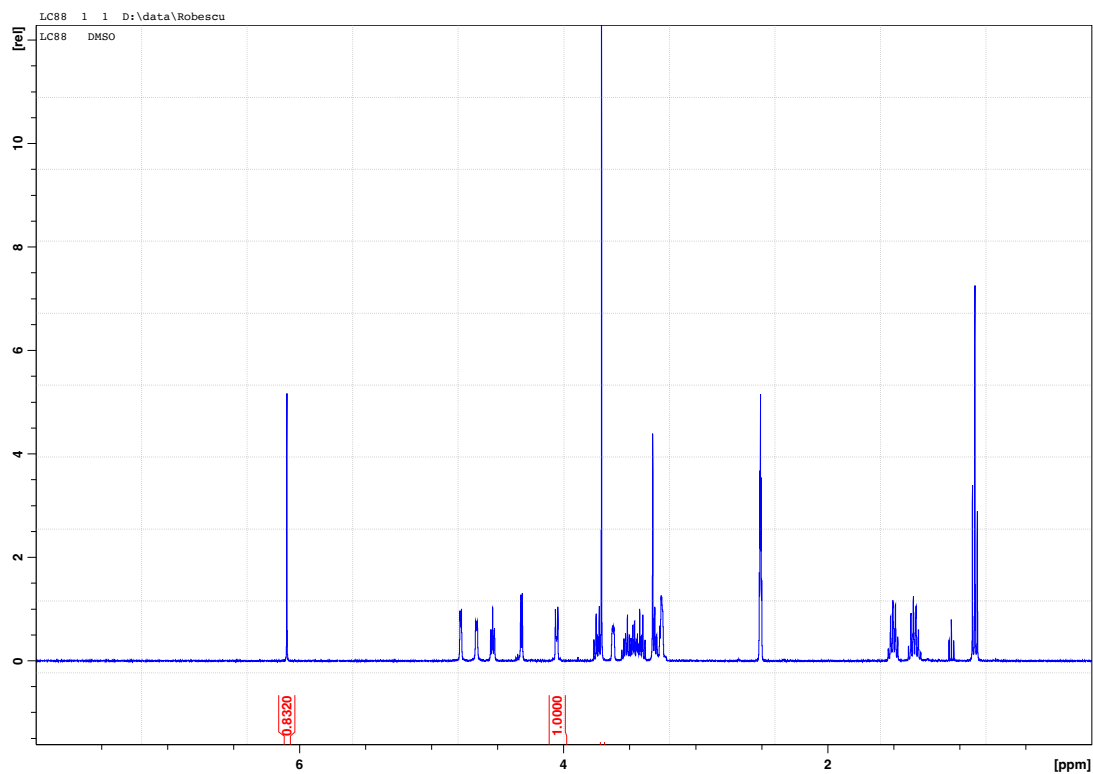

**Figure S9.** <sup>1</sup>H-NMR of BuGal isolated by flash chromatography (Entry 3, Table 1).

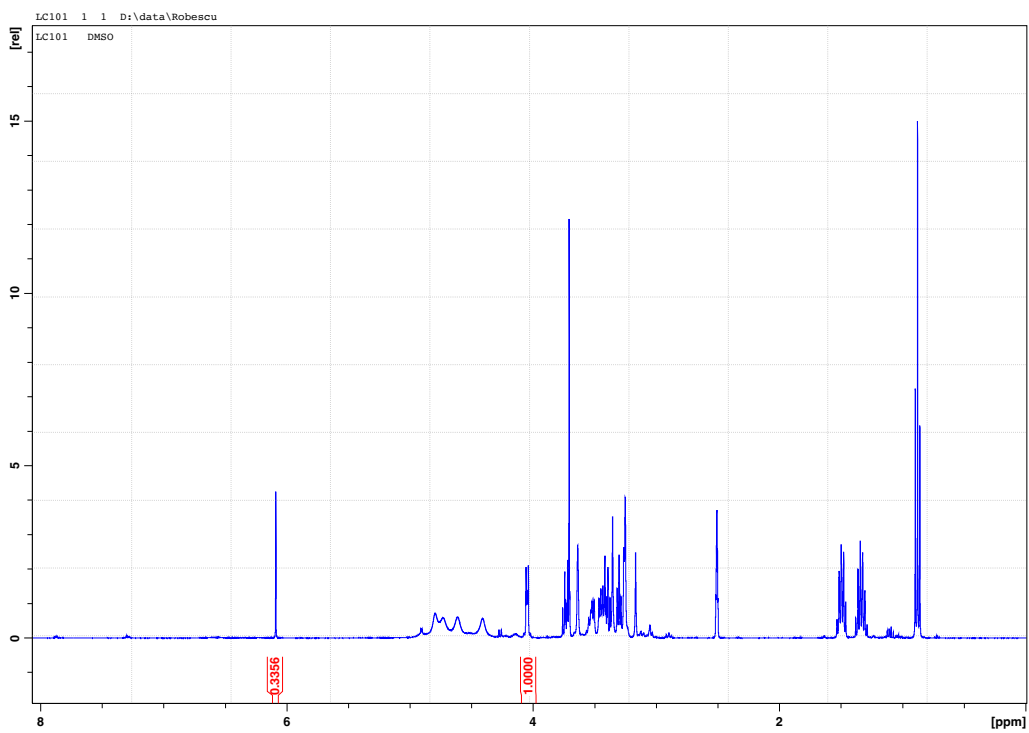

**Figure S10.** <sup>1</sup>H-NMR of BuGal isolated by L/L extraction and elution from XAD with EtOH (Entry 4, Table 1).

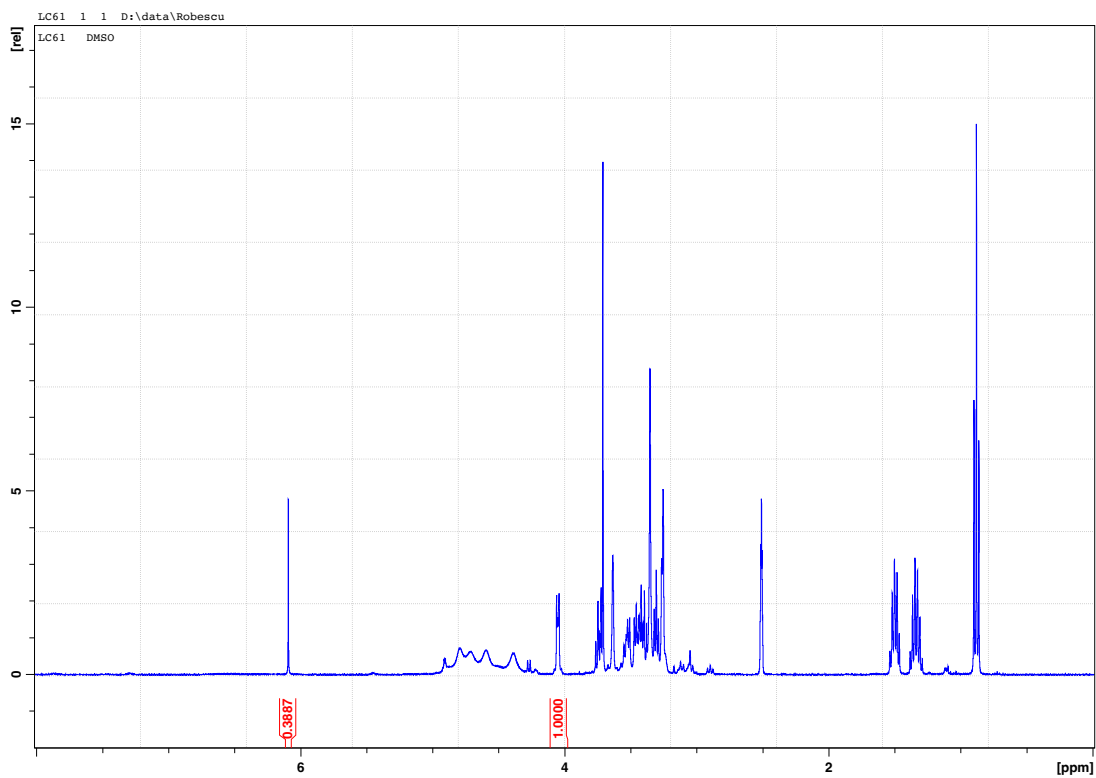

**Figure S11.** <sup>1</sup>H-NMR of BuGal isolated by L/L extraction and elution from XAD with EtOH (Entry 5, Table 1).

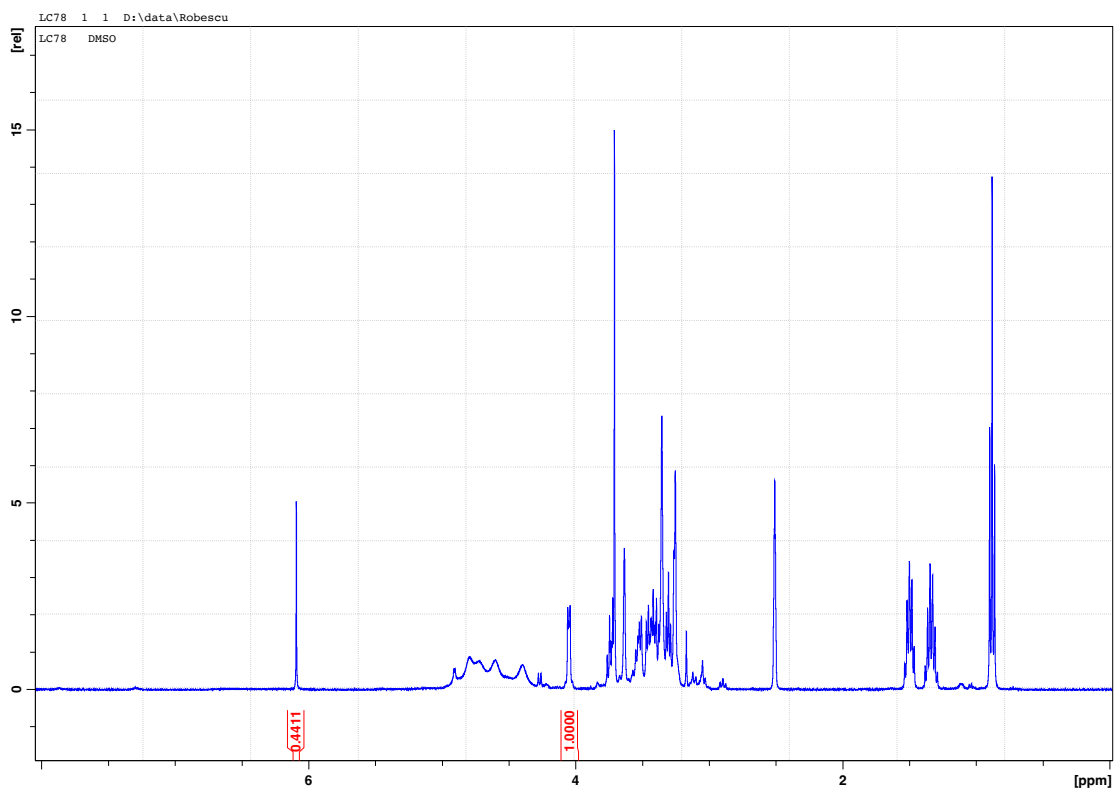

**Figure S12.** <sup>1</sup>H-NMR of BuGal isolated by L/L extraction and elution from XAD with EtOH (Entry 6, Table 1).

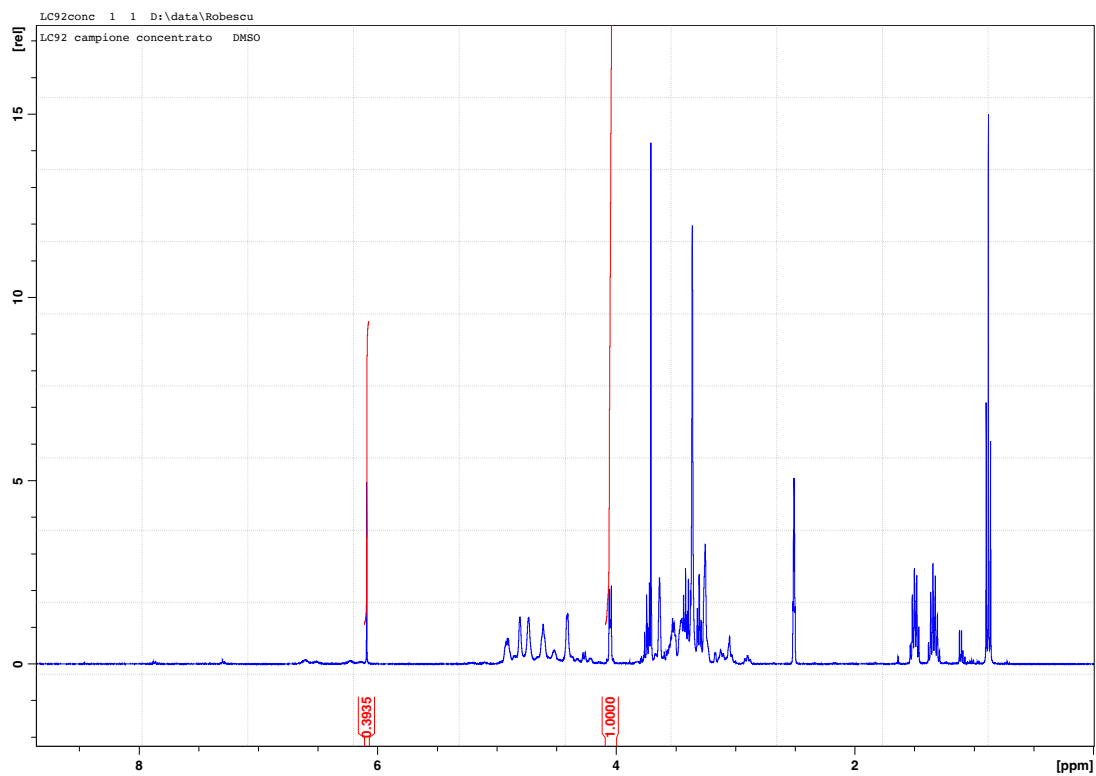

**Figure S13.** <sup>1</sup>H-NMR of BuGal isolated by L/L extraction and elution from XAD with EtOH (Entry 7, Table 1).

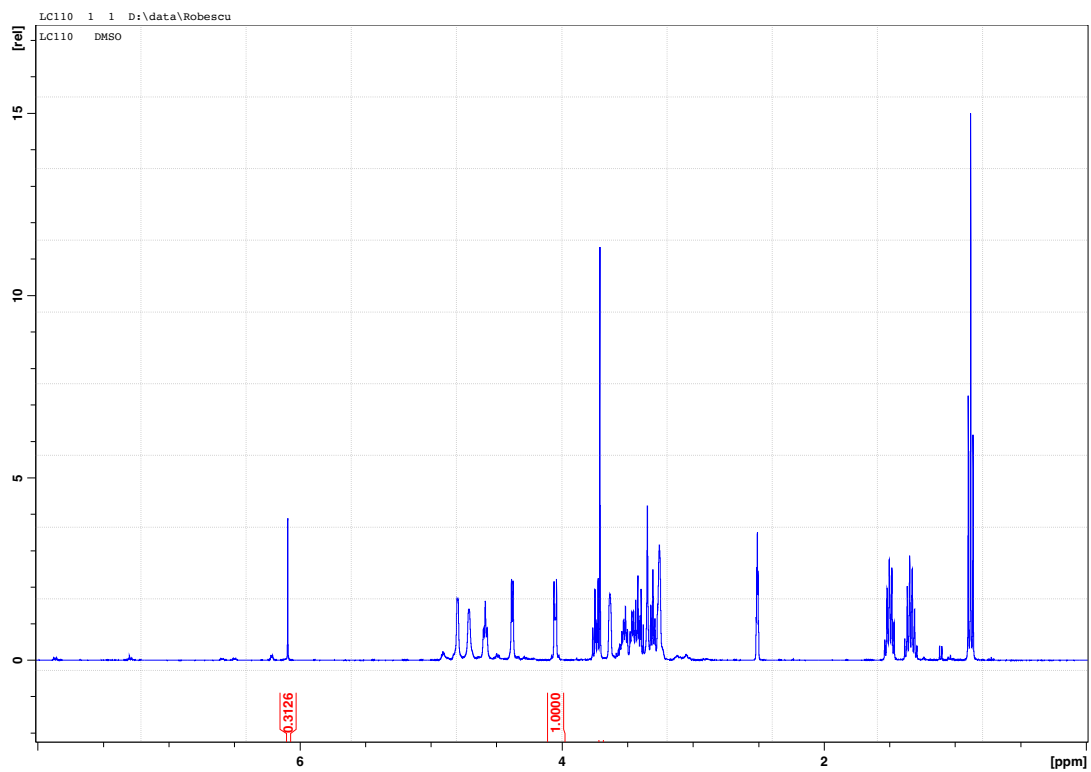

**Figure S14.** <sup>1</sup>H-NMR of BuGal isolated by L/L extraction and elution from XAD with 1-BuOH (Entry 8, Table 1).

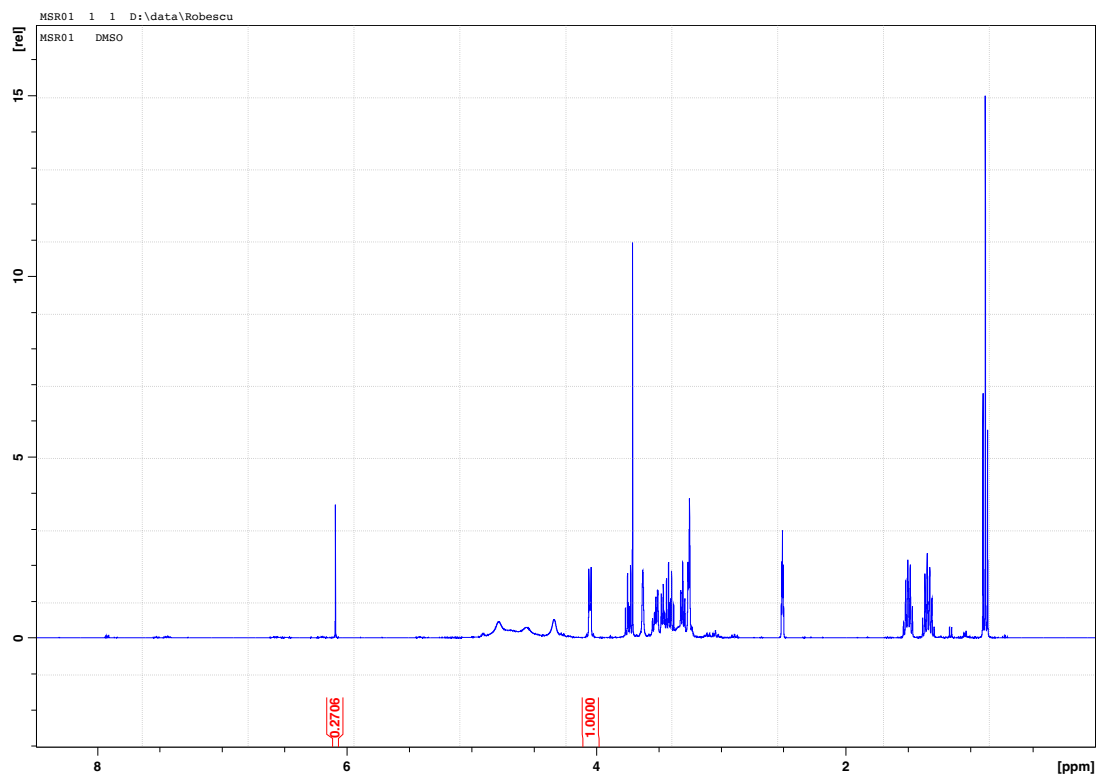

Figure S15. <sup>1</sup>H-NMR of BuGal isolated by L/L extraction and elution from XAD with 1-BuOH (Entry 9, Table 1).

### **Reaction #1: Transglycosylation of WP in ternary system & flash chromatography**

The pH of WP (45 g/L) was adjusted to 4.5 with HCl 1 M. WP (20 mL, corresponding to 2.6 mmol of lactose), 1-BuOH (50 mL), and acetone (30 mL) were mixed in a round bottom flask. The immobilized GalAo (2 g, 2 IU) was added to the reaction and the mixture was maintained under magnetic stirring at 30 °C for 2.5 hours. The reaction was stopped by filtration of the enzyme, and then the immobilized enzyme was washed with 1-BuOH (10 mL). The filtrate was evaporated under reduced pressure, the crude was solubilized in MeOH (10 mL) and added with silica ( $\approx$  2.5 g) to adsorb the components of the reaction mixture. The suspension was dried under reduced pressure and dried silica was loaded on top of a packed silica column for flash chromatography purification (DCM/MeOH, 90:10). The product was obtained as a light-yellow powder (yield: 40%, 250 mg) (Table 1, Entry 1).<sup>1</sup>

### **Reaction #2: Transglycosylation of CWP in ternary system & flash chromatography**

Before setting up the transglycosylation reactions, CWP (126 g/L lactose) was filtered by vacuum filtration using a sintered glass filter to remove a white precipitate that was observed after its thawing and to obtain a clear yellow solution. The pH of CWP (pH 6.7) was adjusted to 4.5 by adding 85% H<sub>3</sub>PO<sub>4</sub> ( $\sim$ 40  $\mu$ L). CWP (20 mL, corresponding to 7.4 mmol of lactose), 1-BuOH (50 mL) and acetone (30 mL) were mixed in a round bottom flask. The immobilized GalAo (2 g, 2 IU) was added to the reaction and the mixture was maintained under magnetic stirring at 30 °C for 17 h hours. The reaction was stopped by filtration of the enzyme, and then the immobilized enzyme was washed with 1-BuOH (10 mL). The filtrate was evaporated under reduced pressure, the crude was solubilized in MeOH and added with silica ( $\approx$  2.5 g) to adsorb the components of the reaction mixture. The suspension was dried under reduced pressure and dried silica was loaded on top of a packed silica column for flash chromatography purification (DCM/MeOH, 90:10). The product was obtained as a light-yellow powder (yield: 30%, 525 mg) (Table 1, Entry 2).

### **Reaction #3: Transglycosylation of CWP in biphasic system & flash chromatography**

Before setting up the transglycosylation reactions, CWP (126 g/L lactose) was filtered by vacuum filtration using a sintered glass filter to remove a white precipitate that was observed after its thawing and to obtain a clear yellow solution. The pH of CWP (pH 6.7) was adjusted to 4.5 by adding 85% H<sub>3</sub>PO<sub>4</sub> ( $\sim$ 40  $\mu$ L). CWP (20 mL, corresponding to 7.4 mmol of lactose) and 1-BuOH (80 mL) were mixed in a round bottom flask. The immobilized GalAo (2 g, 2 IU) was added to the reaction and the mixture was maintained under magnetic stirring at 30 °C for 17 h hours. The reaction was stopped by filtration of the enzyme, and then the immobilized enzyme was washed with 1-BuOH (10 mL). The filtrate was evaporated under reduced pressure, the crude was solubilized in MeOH and added with silica ( $\approx$  2.5 g) to adsorb the components of the reaction mixture. The suspension was dried under reduced pressure and dried silica was loaded on top of a packed silica column for flash chromatography purification (DCM/MeOH, 90:10). The product was obtained as a light-yellow powder (yield: 28%, 485 mg) (Table 1, Entry 3).

### **Reaction #4: Transglycosylation of CWP in biphasic system & simplified work-up (elution with EtOH)**

Before setting up the transglycosylation reactions, CWP (120 g/L lactose) was filtered by vacuum filtration using a sintered glass filter to remove a white precipitate that was observed after its thawing and to obtain a clear yellow solution. The pH of CWP (pH 6.7) was adjusted to 4.5 by adding 85% H<sub>3</sub>PO<sub>4</sub> ( $\sim$ 40  $\mu$ L). CWP (20 mL, corresponding to 7.2 mmol of lactose) and 1-BuOH (80 mL) were mixed in a round bottom flask. The immobilized GalAo (2 g, 2 IU) was added to the reaction and the mixture was maintained under magnetic stirring at 30 °C for 17 h hours. The reaction was stopped by filtration of the enzyme, and then the immobilized enzyme was washed with 1-BuOH (10 mL). The filtrate was transferred into a separatory funnel, washed with a 1% w/v NaCl solution (10 mL) and then it was left to settle overnight to achieve phase separation. The two phases were then recovered separately. The aqueous phase (15 mL), once the reaction was scaled-up, was used for cell growth. The organic phase was dried under reduced pressure, 1-BuOH was recovered to be reused, and the crude was resolubilized in H<sub>2</sub>O (20 mL). Subsequently, Amberlite® XAD4 polymeric adsorbent resin was washed with H<sub>2</sub>O to eliminate the NaCl and Na<sub>2</sub>CO<sub>3</sub> used as preservatives. The wet resin (2 g x 7 batches) was added to the solution under mechanical stirring. Product adsorption onto the resin was monitored by HPLC-ELSD until its almost complete removal from the solution. The resin was then filtered and subjected to five consecutive washings with EtOH (following supplier indications) (10 mL/batch) under mechanical stirring at room temperature until no product was anymore detected in the filtrate by HPLC-ELSD analysis. The EtOH fractions containing the product were then collected and dried under reduced pressure. After drying a light yellow oily solid was obtained which required some washings with diethyl ether (5 mL) and vacuum. The product was obtained as a yellow powder (804 mg<sub>powder</sub>) (Table 1, Entry 4). The powder contained: 73% BuGal (586.92 mg; yield: 35%), 27% others (Glc, Gal and inorganic salts) (217.88 mg).

### **Reaction #5–#6: Transglycosylation of CWP in biphasic system & simplified work-up (elution with EtOH) 1 L scale**

Before setting up the transglycosylation reactions, CWP (123 g/L lactose) was filtered by vacuum filtration using a sintered glass filter to remove a white precipitate that was observed after its thawing and to obtain a clear yellow solution. The pH of CWP (pH 6.7) was adjusted to 4.5 by adding 85% H<sub>3</sub>PO<sub>4</sub> (~400 µL). CWP (200 mL, corresponding to 71.8 mmol of lactose) and 1-BuOH (800 mL) were mixed in a round bottom flask. The immobilized GalAo (20 g, 20 IU) was added to the reaction and the mixture was maintained under magnetic stirring at 30 °C for 17 h hours. The reaction was stopped by filtration of the enzyme, and then the immobilized enzyme was washed with 1-BuOH (100 mL). The filtrate was transferred into a separatory funnel, washed with a 1% w/v NaCl solution (100 mL) and then it was left to settle overnight to achieve phase separation. The two phases were then recovered separately. The aqueous phase (168 mL) containing 63.3 g/L – 73.8 g/L Glc and 27.1 g/L – 48.2 g/L Gal (Table 3) was used for cell growth. The organic phase was dried under reduced pressure, 1-BuOH (1007 mL) was recovered to be reused, and the crude was resolubilized in H<sub>2</sub>O (50 mL). Subsequently, Amberlite® XAD4 polymeric adsorbent resin was washed with H<sub>2</sub>O to eliminate the NaCl and Na<sub>2</sub>CO<sub>3</sub> used as preservatives. The wet resin (10 g x 7 batches) was added to the solution under mechanical stirring. Product adsorption onto the resin was monitored by HPLC-ELSD until its almost complete removal from the solution. The resin was then filtered and subjected to five consecutive washings with EtOH (following supplier indications) (50 mL/batch) under mechanical stirring at room temperature until no product was anymore detected in the filtrate by HPLC-ELSD analysis. The EtOH fractions containing the product were then collected and dried under reduced pressure. After drying a light yellow oily solid was obtained which required some washings with diethyl ether (50 mL) and vacuum. This reaction was performed in duplicate. The product was obtained as a yellow powder (7.03 – 7.8 g<sub>powder</sub>) (Table 1, Entries 5 – 6). The powder contained: 63% – 56.4% BuGal (4.4 g; yield: 14 – 17%), 37 – 43.6% others (Glc, Gal and inorganic salts) (2.62 – 3.4 g).

### **Reaction #7: Transglycosylation of CWP in biphasic system & simplified work-up (elution with EtOH) 1.5 L scale & recycled 1-BuOH**

Before setting up the transglycosylation reactions, CWP (142 g/L lactose) was filtered by vacuum filtration using a sintered glass filter to remove a white precipitate that was observed after its thawing and to obtain a clear yellow solution. The pH of CWP (pH 6.7) was adjusted to 4.5 by adding 85% H<sub>3</sub>PO<sub>4</sub> (~600 µL). CWP (300 mL, corresponding to 124.5 mmol of lactose) and 1-BuOH recovered from the previous reactions (1200 mL) were mixed in a round bottom flask. The immobilized GalAo (30 g, 30 IU) was added to the reaction and the mixture was maintained under magnetic stirring at 30 °C for 17 h hours. The reaction was stopped by filtration of the enzyme, and then the immobilized enzyme was washed with recycled 1-BuOH (250 mL). The filtrate was transferred into a separatory funnel, without washing with a 1% w/v NaCl solution since phase separation was immediately visible probably due to the water content present in the recycled 1-BuOH. The two phases were then recovered separately. The aqueous phase (300 mL) containing 69.0 g/L Glc and 56 g/L Gal (Table 3) was used for cell growth. The organic phase was dried under reduced pressure, 1-BuOH was recovered to be reused, and the crude was resolubilized in H<sub>2</sub>O (50 mL). Subsequently, Amberlite® XAD4 polymeric adsorbent resin was washed with H<sub>2</sub>O to eliminate the NaCl and Na<sub>2</sub>CO<sub>3</sub> used as preservatives. The wet resin (10 g x 7 batches) was added to the solution under mechanical stirring. Product adsorption onto the resin was monitored by HPLC-ELSD until its almost complete removal from the solution. The resin was then filtered and subjected to six consecutive washings with EtOH (following supplier indications) (50 mL/batch) under mechanical stirring at room temperature until no product was anymore detected in the filtrate by HPLC-ELSD analysis. The EtOH fractions containing the product were then collected and dried under reduced pressure. After drying a light yellow oily solid was obtained which required some washings with diethyl ether (50 mL) and vacuum. The product was obtained as a yellow powder (7.20 g<sub>powder</sub>) (Table 1, Entry 7). The powder contained: 50% BuGal (3.6 g; yield: 12%), 50% others (Glc, Gal and inorganic salts) (3.6 g).

### **Reaction #8–#9: Transglycosylation of CWP in biphasic system & simplified work-up (elution with 1-BuOH) 1 L scale**

Before setting up the transglycosylation reactions, CWP (113 – 119 g/L lactose) was filtered by vacuum filtration using a sintered glass filter to remove a white precipitate that was observed after its thawing and to obtain a clear yellow solution. The pH of CWP (pH 6.7) was adjusted to 4.5 by adding 85% H<sub>3</sub>PO<sub>4</sub> (~400 µL). CWP (200 mL, corresponding to 66.0 – 69.5 mmol of lactose) and 1-BuOH (800 mL) were mixed in a round bottom flask. The immobilized GalAo (20 g, 20 IU) was added to the reaction and the mixture was maintained under magnetic stirring at 30 °C for 17 h hours. The reaction was stopped by filtration of the enzyme, and then the immobilized enzyme was washed with 1-BuOH (100 mL). The filtrate was transferred into a separatory funnel, washed with a 1% w/v NaCl solution (100 mL) and then it was left to settle overnight to achieve phase separation. The two phases were then recovered separately. The aqueous phase

(155 – 158 mL) containing 56.6 g/L – 67.9 g/L Glc and 36.2 g/L – 38.8 g/L Gal (Table 3) was used for cell growth. The organic phase was dried under reduced pressure, 1-BuOH was recovered to be reused, and the crude was resolubilized in H<sub>2</sub>O (50 mL). Subsequently, Amberlite® XAD4 polymeric adsorbent resin was washed with H<sub>2</sub>O to eliminate the NaCl and Na<sub>2</sub>CO<sub>3</sub> used as preservatives. The wet resin (10 g x 7 batches) was added to the solution under mechanical stirring. Product adsorption onto the resin was monitored by HPLC-ELSD until its almost complete removal from the solution. The resin was then filtered and washed with 5 mL of 1-BuOH in the first elution step, then 20 mL 1-BuOH and finally 50 mL 1-BuOH for 5 times. In this case the first two volumes eluted were of water (and thus discarded), the third was a mixture of water and 1-BuOH and from the fourth volume just 1-BuOH was recovered. The 1-BuOH fractions containing the product were then collected and dried under reduced pressure. After drying an off white solid was obtained which required some washings with diethyl ether (50 mL) and vacuum. This reaction was performed in duplicate. The product was obtained as a white powder (3.14 – 3.30 g<sub>powder</sub>) (Table 1, Entries 8 – 9). The powder contained: 74.5 – 82% BuGal (2.3 – 2.7 g; yield: 14 – 17%), 25.5 – 18% others (Glc, Gal and inorganic salts) (0.84 – 0.60 g).

## E-factor calculations

For flash chromatography purification the subsequent assumptions were used: 1 L solvent and 100 g silica gel per gram of product.

### Reaction #1

| REACTION                                                    |
|-------------------------------------------------------------|
| WP pH (6.0-6.5) was adjusted to 4.5 by adding HCl 1 M       |
| 20 mL of WP (45 g/L lactose)                                |
| 50 mL 1-BuOH                                                |
| 30 mL acetone                                               |
| 2 g $\beta$ -galactosidase immobilized on glyoxyl-Sepabeads |
| 30 °C for 2.5 h                                             |
| WORKUP                                                      |
| Filtration under vacuum                                     |
| Washing with 1-BuOH (10 mL)                                 |
| Evaporation under reduced pressure                          |
| CHROMATOGRAPHY                                              |
| Crude added to silica ( $\approx$ 2.5 g) and MeOH (10 mL)   |
| Drying under reduced pressure                               |
| Added to column                                             |
| Flash chromatography (25 g silica gel)                      |
| DCM/MeOH 90/10 (250 mL)                                     |
| YIELD                                                       |
| 250 mg (40%)                                                |

### Calculation details

| Step                                         | Calculation                        | Mass (g)      |
|----------------------------------------------|------------------------------------|---------------|
| Lactose in CWP                               | 0.02 L x 45 g/L                    | 0.9           |
| Lactose waste                                | 0.9 g – 0.250 g <sub>product</sub> | 0.65          |
| Water from WP                                | 20 mL x 1 g/mL                     | 20            |
| 1-BuOH (reaction)                            | 50 mL x 0.81 g/mL                  | 40.5          |
| Acetone                                      | 30 mL x 0.79 g/mL                  | 23.7          |
| HCl 1 M                                      | -                                  | n.d.          |
| Immobilized $\beta$ -galactosidase           | Given                              | 2             |
| 1-BuOH (wash)                                | 10 mL x 0.81 g/mL                  | 8.1           |
| MeOH (pre-chromatography)                    | 10 mL x 0.79 g/mL                  | 7.9           |
| Silica gel (pre-chromatography)              | Given                              | 2.5           |
| Silica gel (chromatography)                  | 0.25 g x 100 g <sub>product</sub>  | 25            |
| Chromatography DCM                           | 225 mL x 1.33 g/mL                 | 299.25        |
| Chromatography MeOH                          | 25 mL x 0.79 g/mL                  | 19.75         |
| <b>Product mass</b>                          | Given isolated product             | <b>0.250</b>  |
| <b>Total Waste (reaction)</b>                |                                    | <b>86.85</b>  |
| <b>Total waste (reaction + purification)</b> |                                    | <b>449.35</b> |

$$\text{E-factor (considering only the reaction)} = \frac{86.85 \text{ g (waste)}}{0.250 \text{ g (product)}} = 347.6$$

$$\text{E-factor (considering reaction and purification)} = \frac{449.35 \text{ g (waste)}}{0.250 \text{ g (product)}} = 1797.4$$

**Reaction #2**

| <b>REACTION</b>                                                                          |
|------------------------------------------------------------------------------------------|
| CWP pH (6.7) was adjusted to 4.5 by adding 40 $\mu$ L H <sub>3</sub> PO <sub>4</sub> 85% |
| 20 mL of CWP (126 g/L lactose)                                                           |
| 50 mL 1-BuOH                                                                             |
| 30 mL acetone                                                                            |
| 2 g $\beta$ -galactosidase immobilized on glyoxyl-Sepabeads                              |
| 30 °C for 17 h                                                                           |
| <b>WORKUP</b>                                                                            |
| Filtration under vacuum                                                                  |
| Washing with 1-BuOH (10 mL)                                                              |
| Evaporation under reduced pressure                                                       |
| <b>CHROMATOGRAPHY</b>                                                                    |
| Crude added to silica ( $\approx$ 2.5 g) and MeOH (10 mL)                                |
| Drying under reduced pressure                                                            |
| Added to column                                                                          |
| Flash chromatography (52.5 g silica gel)                                                 |
| DCM/MeOH 90/10 (525 mL)                                                                  |
| <b>YIELD</b>                                                                             |
| 525 mg (30%)                                                                             |

**Calculation details**

| <b>Step</b>                                  | <b>Calculation</b>                  | <b>Mass (g)</b> |
|----------------------------------------------|-------------------------------------|-----------------|
| Lactose in CWP                               | 0.02 L x 126 g/L                    | 2.52            |
| Lactose waste                                | 2.52 g – 0.525 g <sub>product</sub> | 1.99            |
| Water from CWP                               | 20 mL x 1 g/mL                      | 20              |
| 1-BuOH (reaction)                            | 50 mL x 0.81 g/mL                   | 40.5            |
| Acetone                                      | 30 mL x 0.79 g/mL                   | 23.7            |
| H <sub>3</sub> PO <sub>4</sub> acid          | 0.04 mL x 1.685 g/mL                | 0.067           |
| Immobilized $\beta$ -galactosidase           | Given                               | 2               |
| 1-BuOH (wash)                                | 10 mL x 0.81 g/mL                   | 8.1             |
| MeOH (pre-chromatography)                    | 10 mL x 0.79 g/mL                   | 7.9             |
| Silica gel (pre-chromatography)              | Given                               | 2.5             |
| Silica gel (chromatography)                  | 0.525 g x 100 g <sub>product</sub>  | 52.5            |
| Chromatography DCM                           | 472.5 mL x 1.33 g/mL                | 628.4           |
| Chromatography MeOH                          | 52.5 mL x 0.79 g/mL                 | 41.5            |
| <b>Product mass</b>                          | Given isolated product              | <b>0.525</b>    |
| <b>Total Waste (reaction)</b>                |                                     | <b>88.26</b>    |
| <b>Total waste (reaction + purification)</b> |                                     | <b>829.16</b>   |

$$\text{E-factor (considering only the reaction)} = \frac{88.26 \text{ g (waste)}}{0.525 \text{ g (product)}} = 168.11$$

$$\text{E-factor (considering reaction and purification)} = \frac{829.16 \text{ g (waste)}}{0.525 \text{ g (product)}} = 1579.35$$

**Reaction #3**

| <b>REACTION</b>                                                                          |
|------------------------------------------------------------------------------------------|
| CWP pH (6.7) was adjusted to 4.5 by adding 40 $\mu$ L H <sub>3</sub> PO <sub>4</sub> 85% |
| 20 mL of CWP (126 g/L lactose)                                                           |
| 80 mL 1-BuOH                                                                             |
| 2 g $\beta$ -galactosidase immobilized on glyoxyl-Sepabeads                              |
| 30 °C for 17 h                                                                           |
| <b>WORKUP</b>                                                                            |
| Filtration under vacuum                                                                  |
| Washing with 1-BuOH (10 mL)                                                              |
| Evaporation under reduced pressure                                                       |
| <b>CHROMATOGRAPHY</b>                                                                    |
| Crude added to silica ( $\approx$ 2.5 g) and MeOH (10 mL)                                |
| Drying under reduced pressure                                                            |
| Added to column                                                                          |
| Flash chromatography (48.5 g silica gel)                                                 |
| DCM/MeOH 90/10 (485 mL)                                                                  |
| <b>YIELD</b>                                                                             |
| 485 mg (28%)                                                                             |

**Calculation details**

| <b>Step</b>                                  | <b>Calculation</b>                  | <b>Mass (g)</b> |
|----------------------------------------------|-------------------------------------|-----------------|
| Lactose in CWP                               | 0.02 L x 126 g/L                    | 2.52            |
| Lactose waste                                | 2.52 g – 0.485 g <sub>product</sub> | 2.03            |
| Water from CWP                               | 20 mL x 1 g/mL                      | 20              |
| 1-BuOH (reaction)                            | 80 mL x 0.81 g/mL                   | 64.8            |
| H <sub>3</sub> PO <sub>4</sub> acid          | 0.04 mL x 1.685 g/mL                | 0.067           |
| Immobilized $\beta$ -galactosidase           | Given                               | 2               |
| 1-BuOH (wash)                                | 10 mL x 0.81 g/mL                   | 8.1             |
| MeOH (pre-chromatography)                    | 10 mL x 0.79 g/mL                   | 7.9             |
| Silica gel (pre-chromatography)              | Given                               | 2.5             |
| Silica gel (chromatography)                  | 0.485 g x 100 g <sub>product</sub>  | 48.5            |
| Chromatography DCM                           | 436.5 mL x 1.33 g/mL                | 580.5           |
| Chromatography MeOH                          | 48.5 mL x 0.79 g/mL                 | 38.3            |
| <b>Product mass</b>                          | Given isolated product              | <b>0.485</b>    |
| <b>Total Waste (reaction)</b>                |                                     | <b>88.90</b>    |
| <b>Total waste (reaction + purification)</b> |                                     | <b>774.70</b>   |

$$\text{E-factor (considering only the reaction)} = \frac{88.90 \text{ g (waste)}}{0.485 \text{ g (product)}} = 183.30$$

$$\text{E-factor (considering reaction and purification)} = \frac{774.70 \text{ g (waste)}}{0.485 \text{ g (product)}} = 1597.32$$

**Reaction #4**

| <b>REACTION</b>                                                                                                                               |
|-----------------------------------------------------------------------------------------------------------------------------------------------|
| CWP pH (6.7) was adjusted to 4.5 by adding 40 $\mu$ L H <sub>3</sub> PO <sub>4</sub> 85%                                                      |
| 20 mL of CWP (120 g/L lactose)                                                                                                                |
| 80 mL 1-BuOH                                                                                                                                  |
| 2 g $\beta$ -galactosidase immobilized on glyoxyl-Sepabeads                                                                                   |
| 30 °C for 17 h                                                                                                                                |
| <b>WORKUP</b>                                                                                                                                 |
| Filtration under vacuum                                                                                                                       |
| Washing with 1-BuOH (10 mL)                                                                                                                   |
| Washing with NaCl solution 1% w/v (10 mL)                                                                                                     |
| Phase separation                                                                                                                              |
| <b>Catch and release purification</b>                                                                                                         |
| Organic phase drying under reduced pressure                                                                                                   |
| Crude solubilization in H <sub>2</sub> O (20 mL)                                                                                              |
| Product adsorption on XAD4 resin (14 g)                                                                                                       |
| Product elution with EtOH (50 mL)                                                                                                             |
| Drying under reduced pressure                                                                                                                 |
| Washing with diethyl ether (5 mL) + vacuum                                                                                                    |
| <b>YIELD</b>                                                                                                                                  |
| <b>804 mg powder (Entry 4, Table 1):</b><br>586.92 mg BuGal (73% purity) (considering mean of % purity & amount obtained)<br>217.88 mg others |

**Calculation details**

| <b>Step</b>                                  | <b>Calculation</b>                 | <b>Mass (g)</b> |
|----------------------------------------------|------------------------------------|-----------------|
| Lactose in CWP                               | 0.02 L x 120 g/L                   | 2.4             |
| Lactose waste                                | 2.4 g - 0.587 g <sub>product</sub> | 1.81            |
| Water from CWP                               | 20 mL x 1 g/mL                     | 20              |
| 1-BuOH (reaction)                            | 80 mL x 0.81 g/mL                  | 64.8            |
| H <sub>3</sub> PO <sub>4</sub> acid          | 0.04 mL x 1.685 g/mL               | 0.067           |
| Immobilized $\beta$ -galactosidase           | Given                              | 2               |
| 1-BuOH (wash)                                | 10 mL x 0.81 g/mL                  | 8.1             |
| NaCl solution 1% w/v (wash)                  | 10 mL x 1 g/mL                     | 10              |
|                                              | 1% w/v NaCl                        | 0.1             |
| Water (crude solubilization)                 | 20 mL x 1 g/mL                     | 20              |
| XAD resin                                    | Given                              | 14              |
| EtOH (elution)                               | 50 mL x 0.789 g/mL                 | 39.45           |
| Diethyl ether (washing)                      | 5 mL x 0.713 g/mL                  | 3.56            |
| <b>Product mass</b>                          | Given isolated product             | 0.587           |
| <b>Total Waste (reaction)</b>                |                                    | <b>88.68</b>    |
| <b>Total waste (reaction + purification)</b> |                                    | <b>183.89</b>   |

$$\text{E-factor (considering only the reaction)} = \frac{88.68 \text{ g (waste)}}{0.587 \text{ g (product)}} = 151.07$$

$$\text{E-factor (considering reaction and purification)} = \frac{183.89 \text{ g (waste)}}{0.587 \text{ g (product)}} = 313.27$$

**Reaction #5–#6**

| <b>REACTION</b>                                                                                                                                                                              |
|----------------------------------------------------------------------------------------------------------------------------------------------------------------------------------------------|
| CWP pH (6.7) was adjusted to 4.5 by adding 400 $\mu$ L H <sub>3</sub> PO <sub>4</sub> 85%                                                                                                    |
| 200 mL of CWP (123 g/L lactose)                                                                                                                                                              |
| 800 mL 1-BuOH                                                                                                                                                                                |
| 20 g $\beta$ -galactosidase immobilized on glyoxyl-Sepabeads                                                                                                                                 |
| 30 °C for 17 h                                                                                                                                                                               |
| <b>WORKUP</b>                                                                                                                                                                                |
| Filtration under vacuum                                                                                                                                                                      |
| Washing with 1-BuOH (100 mL)                                                                                                                                                                 |
| Washing with NaCl solution 1% w/v (100 mL)                                                                                                                                                   |
| Phase separation                                                                                                                                                                             |
| <b>Catch and release purification</b>                                                                                                                                                        |
| Organic phase drying under reduced pressure                                                                                                                                                  |
| Crude solubilization in H <sub>2</sub> O (50 mL)                                                                                                                                             |
| Product adsorption on XAD4 resin (70 g)                                                                                                                                                      |
| Product elution with EtOH (250 mL)                                                                                                                                                           |
| Drying under reduced pressure                                                                                                                                                                |
| Washing with diethyl ether (50 mL) + vacuum                                                                                                                                                  |
| <b>YIELD</b>                                                                                                                                                                                 |
| <b>7.0 g</b> (Entry 5, Table 1) – <b>7.8 g</b> (Entry 6, Table 1) <b>powder:</b><br>4.4 g BuGal (63% – 56.4% purity) (considering mean of % purity & amount obtained)<br>2.62 – 3.4 g others |

**Calculation details**

| <b>Step</b>                                  | <b>Calculation</b>                | <b>Mass (g)</b> |
|----------------------------------------------|-----------------------------------|-----------------|
| Lactose in CWP                               | 0.2 L x 123 g/L                   | 24.6            |
| Lactose waste                                | 24.6 g – 4.4 g <sub>product</sub> | 20.2            |
| Water from CWP                               | 200 mL x 1 g/mL                   | 200             |
| 1-BuOH (reaction)                            | 800 mL x 0.81 g/mL                | 648             |
| H <sub>3</sub> PO <sub>4</sub> acid          | 0.4 mL x 1.685 g/mL               | 0.67            |
| Immobilized $\beta$ -galactosidase           | Given                             | 20              |
| 1-BuOH (wash)                                | 100 mL x 0.81 g/mL                | 81              |
| NaCl solution 1% w/v (wash)                  | 100 mL x 1 g/mL                   | 100             |
|                                              | 1% w/v NaCl                       | 1               |
| Water (crude solubilization)                 | 50 mL x 1 g/mL                    | 50              |
| XAD resin                                    | Given                             | 70              |
| EtOH (elution)                               | 250 mL x 0.789 g/mL               | 197.25          |
| Diethyl ether (washing)                      | 50 mL x 0.713 g/mL                | 35.65           |
| <b>Product mass</b>                          | Given isolated product            | 4.4             |
| <b>Total Waste (reaction)</b>                |                                   | <b>888.87</b>   |
| <b>Total waste (reaction + purification)</b> |                                   | <b>1423.77</b>  |

$$\text{E-factor (considering only the reaction)} = \frac{888.87 \text{ g (waste)}}{4.4 \text{ g (product)}} = 202.01$$

$$\text{E-factor (considering reaction and purification)} = \frac{1423.77 \text{ g (waste)}}{4.4 \text{ g (product)}} = 323.58$$

An additional E-factor was calculated not considering as waste the recovered and reused materials:

- Glc and Gal recovered in the aqueous phase were not included in the calculations (see **Table 3**);
- the volume of 1-BuOH used for reaction (800 mL) and for enzyme washing (100 mL) was not included in the calculations since it was recovered and recycled in a subsequent reaction. A loss of 10% was considered as waste due to its slight miscibility with water;
- the volume of water from CWP (200 mL) was mostly recovered (168 mL) and used for cell growth, just the unrecovered volume (32 mL) was considered as waste;
- Amberlite XAD4 was not included as waste since it is recovered and it can be regenerated and reused.

#### Calculation details

| Step                                                                         | Calculation                           | Mass (g)      |
|------------------------------------------------------------------------------|---------------------------------------|---------------|
| Lactose in CWP                                                               | 0.2 L x 123 g/L                       | 24.6          |
| Glc in CWP                                                                   | 24.6 g/2                              | 12.3          |
| Gal in CWP unreacted                                                         | (24.6 g/2) – 4.4 g <sub>product</sub> | 7.9           |
| Glc in aq. phase (average 68.5 g/L)                                          | 68.5 g/L x 0.168 L                    | 11.51         |
| Gal in aq. phase (average 37.6 g/L)                                          | 37.6 g/L x 0.168 L                    | 6.32          |
| Glc waste                                                                    | 12.3 g – 11.51 g                      | 0.79          |
| Gal waste                                                                    | 7.9 g – 6.32 g                        | 1.58          |
| Water from CWP                                                               | (200 mL -168 mL) x 1 g/L              | 32            |
| 1-BuOH (reaction + washing))                                                 | [(800 mL x 0.81 g/mL) x 10]/100       | 64.8          |
| H <sub>3</sub> PO <sub>4</sub> acid                                          | 0.4 mL x 1.685 g/mL                   | 0.67          |
| Immobilized β-galactosidase                                                  | Given                                 | 20            |
| 1-BuOH (wash)                                                                | [(100 mL x 0.81 g/mL) x 10]/100       | 8.1           |
| NaCl solution 1% w/v (wash)                                                  | 100 mL x 1 g/mL                       | 100           |
|                                                                              | 1% w/v NaCl                           | 1             |
| Water (crude solubilization)                                                 | 50 mL x 1 g/mL                        | 50            |
| EtOH (elution)                                                               | 250 mL x 0.789 g/mL                   | 197.25        |
| Diethyl ether (washing)                                                      | 50 mL x 0.713 g/mL                    | 35.65         |
| <b>Product mass</b>                                                          | Given isolated product                | <b>4.4</b>    |
| <b>Total waste (reaction + purification considering recovered materials)</b> |                                       | <b>511.84</b> |

$$\text{E-factor (considering the recovered materials)} = \frac{511.84 \text{ g (waste)}}{4.4 \text{ g (product)}} = 116.32$$

**Reaction #7**

| <b>REACTION</b>                                                                           |
|-------------------------------------------------------------------------------------------|
| CWP pH (6.7) was adjusted to 4.5 by adding 600 $\mu$ L H <sub>3</sub> PO <sub>4</sub> 85% |
| 300 mL of CWP (142 g/L lactose)                                                           |
| 1200 mL 1-BuOH (recycled)                                                                 |
| 30 g $\beta$ -galactosidase immobilized on glyoxyl-Sepabeads                              |
| 30 °C for 17 h                                                                            |
| <b>WORKUP</b>                                                                             |
| Filtration under vacuum                                                                   |
| Washing with recycled 1-BuOH (250 mL)                                                     |
| Phase separation                                                                          |
| <b>Catch and release purification</b>                                                     |
| Organic phase drying under reduced pressure                                               |
| Crude solubilization in H <sub>2</sub> O (50 mL)                                          |
| Product adsorption on XAD4 resin (70 g)                                                   |
| Product elution with EtOH (300 mL)                                                        |
| Drying under reduced pressure                                                             |
| Washing with diethyl ether (50 mL) + vacuum                                               |
| <b>YIELD</b>                                                                              |
| <b>7.2 g powder</b> (Entry 7, Table 1)                                                    |
| 3.6 g BuGal (50% purity) (considering mean of % purity & amount obtained)                 |
| 3.6 g others                                                                              |

**Calculation details**

| <b>Step</b>                                  | <b>Calculation</b>     | <b>Mass (g)</b> |
|----------------------------------------------|------------------------|-----------------|
| Lactose in CWP                               | 0.3 L x 142 g/L        | 42.6            |
| Water from CWP                               | 300 mL x 1 g/mL        | 300             |
| 1-BuOH recycled (reaction)                   | 1200 mL x 0.81 g/mL    | 972             |
| H <sub>3</sub> PO <sub>4</sub> acid          | 0.6 mL x 1.685 g/mL    | 1.01            |
| Immobilized $\beta$ -galactosidase           | Given                  | 30              |
| 1-BuOH recycled (wash)                       | 250 mL x 0.81 g/mL     | 202.5           |
| Water (crude solubilization)                 | 50 mL x 1 g/mL         | 50              |
| XAD resin                                    | Given                  | 70              |
| EtOH (elution)                               | 300 mL x 0.789 g/mL    | 236.7           |
| Diethyl ether (washing)                      | 50 mL x 0.713 g/mL     | 35.65           |
| <b>Product mass</b>                          | Given isolated product | <b>3.6</b>      |
| <b>Total Waste (reaction)</b>                |                        | <b>1345.61</b>  |
| <b>Total waste (reaction + purification)</b> |                        | <b>1940.46</b>  |

$$\text{E-factor (considering only the reaction)} = \frac{1345.61 \text{ g (waste)}}{3.6 \text{ g (product)}} = 373.78$$

$$\text{E-factor (considering reaction and purification)} = \frac{1940.46 \text{ g (waste)}}{3.6 \text{ g (product)}} = 539.02$$

An additional E-factor was calculated not considering as waste the recovered and reused materials:

- Glc and Gal recovered in the aqueous phase were not included in the calculations (see **Table 3**);
- the volume of 1-BuOH used for reaction (1200 mL) and for enzyme washing (250 mL) was not included in the calculations since it was recovered and can be recycled in a subsequent reaction. A loss of 10% was considered as waste due to its slight miscibility with water;
- the volume of water from CWP (300 mL) was totally recovered (300 mL) and used for cell growth, thus was not considered as waste;
- Amberlite XAD4 was not included as waste since it is recovered and it can be regenerated and reused.

| Step                                                                         | Calculation                           | Mass (g)      |
|------------------------------------------------------------------------------|---------------------------------------|---------------|
| Lactose in CWP                                                               | 0.3 L x 142 g/L                       | 42.6          |
| Glc in CWP                                                                   | 42.6 g/2                              | 21.3          |
| Gal in CWP                                                                   | (42.6 g/2) – 3.6 g <sub>product</sub> | 17.7          |
| Glc in aq. phase (69.0 g/L)                                                  | 69.0 g/L x 0.3 L                      | 20.7          |
| Gal in aq. phase (56 g/L)                                                    | 56 g/L x 0.3 L                        | 16.8          |
| Glc waste                                                                    | 21.3 g – 20.7 g                       | 0.6           |
| Gal waste                                                                    | 17.7 g – 16.8 g                       | 0.9           |
| 1-BuOH recycled (reaction)                                                   | [(1200 mL x 0.81 g/mL) x 10]/100      | 97.2          |
| H <sub>3</sub> PO <sub>4</sub> acid                                          | 0.6 mL x 1.685 g/mL                   | 1.01          |
| Immobilized β-galactosidase                                                  | Given                                 | 30            |
| 1-BuOH recycled (wash)                                                       | [(250 mL x 0.81 g/mL) x 10]/100       | 20.25         |
| Water (crude solubilization)                                                 | 50 mL x 1 g/mL                        | 50            |
| EtOH (elution)                                                               | 300 mL x 0.789 g/mL                   | 236.7         |
| Diethyl ether (washing)                                                      | 50 mL x 0.713 g/mL                    | 35.65         |
| <b>Product mass</b>                                                          | Given isolated product                | <b>3.6</b>    |
| <b>Total waste (reaction + purification considering recovered materials)</b> |                                       | <b>472.31</b> |

$$\text{E-factor (considering the recovered materials)} = \frac{472.31 \text{ g (waste)}}{3.6 \text{ g (product)}} = 131.2$$

**Reaction #8–#9**

| <b>REACTION</b>                                                                           |
|-------------------------------------------------------------------------------------------|
| CWP pH (6.7) was adjusted to 4.5 by adding 400 $\mu$ L H <sub>3</sub> PO <sub>4</sub> 85% |
| 200 mL of CWP (113 – 119 g/L lactose)                                                     |
| 800 mL 1-BuOH                                                                             |
| 20 g $\beta$ -galactosidase immobilized on glyoxyl-Sepabeads                              |
| 30 °C for 17 h                                                                            |
| <b>WORKUP</b>                                                                             |
| Filtration under vacuum                                                                   |
| Washing with 1-BuOH (100 mL)                                                              |
| Washing with NaCl solution 1% w/v (100 mL)                                                |
| Phase separation                                                                          |
| <b>Catch and release purification</b>                                                     |
| Organic phase drying under reduced pressure                                               |
| Crude solubilization in H <sub>2</sub> O (50 mL)                                          |
| Product adsorption on XAD4 resin (70 g)                                                   |
| Product elution with 1-BuOH (275 mL)                                                      |
| Drying under reduced pressure                                                             |
| Washing with diethyl ether (50 mL) + vacuum                                               |
| <b>YIELD</b>                                                                              |
| <b>3.14 g</b> (Entry 8, Table 1) – <b>3.3 g</b> (Entry 9, Table 1) <b>powder</b>          |
| 2.3 – 2.7 g BuGal (74.5- 82% purity) (considering mean of % purity & amount obtained)     |
| 0.84 – 0.60 g others                                                                      |

**Calculation details**

| <b>Step</b>                                  | <b>Calculation</b>                | <b>Mass (g)</b> |
|----------------------------------------------|-----------------------------------|-----------------|
| Lactose in CWP (mean)                        | 0.2 L x 116 g/L                   | 23.2            |
| Lactose waste                                | 23.2 g – 2.5 g <sub>product</sub> | 20.7            |
| Water from CWP                               | 200 mL x 1 g/mL                   | 200             |
| 1-BuOH (reaction)                            | 800 mL x 0.81 g/mL                | 648             |
| H <sub>3</sub> PO <sub>4</sub> acid          | 0.4 mL x 1.685 g/mL               | 0.67            |
| Immobilized $\beta$ -galactosidase           | Given                             | 20              |
| 1-BuOH (wash)                                | 100 mL x 0.81 g/mL                | 81              |
| NaCl solution 1% w/v (wash)                  | 100 mL x 1 g/mL                   | 100             |
|                                              | 1% w/v NaCl                       | 1               |
| Water (crude solubilization)                 | 50 mL x 1 g/mL                    | 50              |
| XAD resin                                    | Given                             | 70              |
| 1-BuOH (elution)                             | 275 mL x 0.81 g/mL                | 222.75          |
| Diethyl ether (washing)                      | 50 mL x 0.713 g/mL                | 35.65           |
| <b>Product mass</b>                          | Given isolated product (mean)     | <b>2.5</b>      |
| <b>Total Waste (reaction)</b>                |                                   | <b>889.37</b>   |
| <b>Total waste (reaction + purification)</b> |                                   | <b>1449.77</b>  |

$$\text{E-factor (considering only the reaction)} = \frac{889.37 \text{ g (waste)}}{2.5 \text{ g (product)}} = 355.75$$

$$\text{E-factor (considering reaction and purification)} = \frac{1449.77 \text{ g (waste)}}{2.5 \text{ g (product)}} = 579.91$$

An additional E-factor was calculated not considering as waste the recovered and reused materials:

- Glc and Gal recovered in the aqueous phase were not included in the calculations (see **Table 3**);
- the volume of 1-BuOH used for reaction (800 mL) and for enzyme washing (100 mL) was not included in the calculations since it was recovered and can be recycled in a subsequent reaction. A loss of 10% was considered as waste due to its slight miscibility with water;
- the volume of water from CWP (250 mL) was mostly recovered (155 – 158 mL) and used for cell growth, thus was not considered as waste;
- Amberlite XAD4 was not included as waste since it is recovered and it can be regenerated and reused.

| Step                                                                         | Calculation                           | Mass (g)      |
|------------------------------------------------------------------------------|---------------------------------------|---------------|
| Lactose in CWP (mean)                                                        | 0.2 L x 116 g/L                       | 23.2          |
| Glc in CWP                                                                   | 23.2 g/2                              | 11.6          |
| Gal in CWP                                                                   | (23.2 g/2) – 2.5 g <sub>product</sub> | 9.1           |
| Glc in aq. phase (average 62.25 g/L)                                         | 62.25 g/L x 0.1565 L                  | 9.74          |
| Gal in aq. phase (average 37.5 g/L)                                          | 37.5 g/L x 0.1565 L                   | 5.87          |
| Glc waste                                                                    | 11.6 g – 9.74 g                       | 1.86          |
| Gal waste                                                                    | 9.1 g – 5.87 g                        | 3.23          |
| Water from CWP                                                               | (200 mL – 156.5 mL) x 1 g/mL          | 43.5          |
| 1-BuOH (reaction)                                                            | [(800 mL x 0.81 g/mL) x 10]/100       | 64.8          |
| H <sub>3</sub> PO <sub>4</sub> acid                                          | 0.4 mL x 1.685 g/mL                   | 0.67          |
| Immobilized β-galactosidase                                                  | Given                                 | 20            |
| 1-BuOH (wash)                                                                | [(100 mL x 0.81 g/mL) x 10]/100       | 8.1           |
| NaCl solution 1% w/v (wash)                                                  | 100 mL x 1 g/mL                       | 100           |
|                                                                              | 1% w/v NaCl                           | 1             |
| Water (crude solubilization)                                                 | 50 mL x 1 g/mL                        | 50            |
| 1-BuOH (elution)                                                             | 275 mL x 0.81 g/mL                    | 222.75        |
| Diethyl ether (washing)                                                      | 50 mL x 0.713 g/mL                    | 35.65         |
| <b>Product mass</b>                                                          | Given isolated product (mean)         | <b>2.5</b>    |
| <b>Total waste (reaction + purification considering recovered materials)</b> |                                       | <b>551.56</b> |

$$\text{E-factor (considering the recovered materials)} = \frac{551.56 \text{ g (waste)}}{2.5 \text{ g (product)}} = 220.62$$

## E<sup>+</sup>-factor calculations

The E<sup>+</sup>-factor calculations were performed considering only the reaction unit. The CO<sub>2</sub> equivalency was calculated taking into account the current equivalency in Europe equal to ~240 g CO<sub>2</sub>/kWh.<sup>2</sup>

### Reaction #1

The approximate energy consumption calculation for stirring plus heating at 30 °C for 2.5 hours was calculated by taking into consideration the following parameters:

| Parameter                                                                                  | Calculations                                                     | Value                 |
|--------------------------------------------------------------------------------------------|------------------------------------------------------------------|-----------------------|
| Magnetic stirrer motor power                                                               | Given for a typical lab stirrers                                 | 20 W                  |
| Heating plate power                                                                        | Given assuming heat cycles to maintain 30°C, less than max 300 W | 150 W (average)       |
| Total operation time                                                                       | Given                                                            | 2.5 h                 |
| Total power combined                                                                       | 20 + 150                                                         | 170 W                 |
| Energy consumption                                                                         | 0.170 kW x 2.5 h                                                 | 0.425 kWh             |
| CO <sub>2</sub> equivalency                                                                | 0.425 kWh x 240 g CO <sub>2</sub> /kWh                           | 102 g CO <sub>2</sub> |
| Waste mass                                                                                 | From previous E-factor calculations (total inputs reaction unit) | 86.85 g               |
| <b>Total waste including energy equivalent = 102 g CO<sub>2</sub> + 86.85 g = 188.85 g</b> |                                                                  |                       |

$$E^{\text{+factor}} = \frac{188.85 \text{ g (waste+energy)}}{0.250 \text{ g (product)}} = 755.40$$

### Reaction #2

The approximate energy consumption calculation for stirring plus heating at 30 °C for 17 hours was calculated by taking into consideration the following parameters:

| Parameter                                                                                    | Calculations                                                     | Value                   |
|----------------------------------------------------------------------------------------------|------------------------------------------------------------------|-------------------------|
| Magnetic stirrer motor power                                                                 | Given for a typical lab stirrers                                 | 20 W                    |
| Heating plate power                                                                          | Given assuming heat cycles to maintain 30°C, less than max 300 W | 150 W (average)         |
| Total operation time                                                                         | Given                                                            | 17 h                    |
| Total power combined                                                                         | 20 + 150                                                         | 170 W                   |
| Energy consumption                                                                           | 0.170 kW x 17 h                                                  | 2.89 kWh                |
| CO <sub>2</sub> equivalency                                                                  | 2.89 kWh x 240 g CO <sub>2</sub> /kWh                            | 693.6 g CO <sub>2</sub> |
| Waste mass                                                                                   | From previous E-factor calculations (total inputs reaction unit) | 88.26 g                 |
| <b>Total waste including energy equivalent = 693.6 g CO<sub>2</sub> + 88.26 g = 781.86 g</b> |                                                                  |                         |

$$E^{\text{+factor}} = \frac{781.86 \text{ g (waste+energy)}}{0.525 \text{ g (product)}} = 1489.25$$

### Reaction #3

The approximate energy consumption calculation for stirring plus heating at 30 °C for 17 hours was calculated by taking into consideration the following parameters:

| Parameter                                                                                   | Calculations                                                     | Value                   |
|---------------------------------------------------------------------------------------------|------------------------------------------------------------------|-------------------------|
| Magnetic stirrer motor power                                                                | Given for a typical lab stirrers                                 | 20 W                    |
| Heating plate power                                                                         | Given assuming heat cycles to maintain 30°C, less than max 300 W | 150 W (average)         |
| Total operation time                                                                        | Given                                                            | 17 h                    |
| Total power combined                                                                        | 20 + 150                                                         | 170 W                   |
| Energy consumption                                                                          | 0.170 kW x 17 h                                                  | 2.89 kWh                |
| CO <sub>2</sub> equivalency                                                                 | 2.89 kWh x 240 g CO <sub>2</sub> /kWh                            | 693.6 g CO <sub>2</sub> |
| Waste mass                                                                                  | From previous E-factor calculations (total inputs reaction unit) | 88.90 g                 |
| <b>Total waste including energy equivalent = 693.6 g CO<sub>2</sub> + 88.90 g = 782.5 g</b> |                                                                  |                         |

$$E^{\text{+factor}} = \frac{782.5 \text{ g (waste+energy)}}{0.485 \text{ g (product)}} = 1613.40$$

### Reaction #4

The approximate energy consumption calculation for stirring plus heating at 30 °C for 17 hours was calculated by taking into consideration the following parameters:

| Parameter                                                                                    | Calculations                                                     | Value                   |
|----------------------------------------------------------------------------------------------|------------------------------------------------------------------|-------------------------|
| Magnetic stirrer motor power                                                                 | Given for a typical lab stirrers                                 | 20 W                    |
| Heating plate power                                                                          | Given assuming heat cycles to maintain 30°C, less than max 300 W | 150 W (average)         |
| Total operation time                                                                         | Given                                                            | 17 h                    |
| Total power combined                                                                         | 20 + 150                                                         | 170 W                   |
| Energy consumption                                                                           | 0.170 kW x 17 h                                                  | 2.89 kWh                |
| CO <sub>2</sub> equivalency                                                                  | 2.89 kWh x 240 g CO <sub>2</sub> /kWh                            | 693.6 g CO <sub>2</sub> |
| Waste mass                                                                                   | From previous E-factor calculations (total inputs reaction unit) | 88.68 g                 |
| <b>Total waste including energy equivalent = 693.6 g CO<sub>2</sub> + 88.68 g = 782.28 g</b> |                                                                  |                         |

$$E^{\text{+factor}} = \frac{782.28 \text{ g (waste+energy)}}{0.586 \text{ g (product)}} = 1334.94$$

### Reaction #5–#6

The approximate energy consumption calculation for stirring plus heating at 30 °C for 17 hours was calculated by taking into consideration the following parameters:

| Parameter                                                                                      | Calculations                                                     | Value                   |
|------------------------------------------------------------------------------------------------|------------------------------------------------------------------|-------------------------|
| Magnetic stirrer motor power                                                                   | Given for a typical lab stirrers                                 | 20 W                    |
| Heating plate power                                                                            | Given assuming heat cycles to maintain 30°C, less than max 300 W | 150 W (average)         |
| Total operation time                                                                           | Given                                                            | 17 h                    |
| Total power combined                                                                           | 20 + 150                                                         | 170 W                   |
| Energy consumption                                                                             | 0.170 kW x 17 h                                                  | 2.89 kWh                |
| CO <sub>2</sub> equivalency                                                                    | 2.89 kWh x 240 g CO <sub>2</sub> /kWh                            | 693.6 g CO <sub>2</sub> |
| Waste mass                                                                                     | From previous E-factor calculations (total inputs reaction unit) | 888.87 g                |
| <b>Total waste including energy equivalent = 693.6 g CO<sub>2</sub> + 888.87 g = 1582.47 g</b> |                                                                  |                         |

$$E^+ \text{-factor} = \frac{1587.42 \text{ g (waste+energy)}}{4.4 \text{ g (product)}} = 359.65$$

### Reaction #7

The approximate energy consumption calculation for stirring plus heating at 30 °C for 17 hours was calculated by taking into consideration the following parameters:

| Parameter                                                                                      | Calculations                                                     | Value                   |
|------------------------------------------------------------------------------------------------|------------------------------------------------------------------|-------------------------|
| Magnetic stirrer motor power                                                                   | Given for a typical lab stirrers                                 | 20 W                    |
| Heating plate power                                                                            | Given assuming heat cycles to maintain 30°C, less than max 300 W | 150 W (average)         |
| Total operation time                                                                           | Given                                                            | 17 h                    |
| Total power combined                                                                           | 20 + 150                                                         | 170 W                   |
| Energy consumption                                                                             | 0.170 kW x 17 h                                                  | 2.89 kWh                |
| CO <sub>2</sub> equivalency                                                                    | 2.89 kWh x 240 g CO <sub>2</sub> /kWh                            | 693.6 g CO <sub>2</sub> |
| Waste mass                                                                                     | From previous E-factor calculations (total inputs reaction unit) | 1345.61 g               |
| <b>Total waste including energy equivalent = 693.6 g CO<sub>2</sub>+ 1345.61 g = 2039.21 g</b> |                                                                  |                         |

$$E^+ \text{-factor} = \frac{2039.21 \text{ g (waste+energy)}}{3.6 \text{ g (product)}} = 566.47$$

### Reaction #8–#9

The approximate energy consumption calculation for stirring plus heating at 30 °C for 17 hours was calculated by taking into consideration the following parameters:

| Parameter                                                                                     | Calculations                                                     | Value                   |
|-----------------------------------------------------------------------------------------------|------------------------------------------------------------------|-------------------------|
| Magnetic stirrer motor power                                                                  | Given for a typical lab stirrers                                 | 20 W                    |
| Heating plate power                                                                           | Given assuming heat cycles to maintain 30°C, less than max 300 W | 150 W (average)         |
| Total operation time                                                                          | Given                                                            | 17 h                    |
| Total power combined                                                                          | 20 + 150                                                         | 170 W                   |
| Energy consumption                                                                            | 0.170 kW x 17 h                                                  | 2.89 kWh                |
| CO <sub>2</sub> equivalency                                                                   | 2.89 kWh x 240 g CO <sub>2</sub> /kWh                            | 693.6 g CO <sub>2</sub> |
| Waste mass                                                                                    | From previous E-factor calculations (total inputs reaction unit) | 889.37 g                |
| <b>Total waste including energy equivalent = 693.6 g CO<sub>2</sub>+ 889.37 g = 1582.97 g</b> |                                                                  |                         |

$$E^+ \text{-factor} = \frac{1582.97 \text{ g (waste+energy)}}{2.5 \text{ g (product)}} = 633.20$$

## Eco-impact

GSK Eco-Impact composite scores used for the calculations are reported below from Ferrara et al.<sup>3</sup>

| Solvent          | Score and eco-impact (per kg solvent) |
|------------------|---------------------------------------|
| H <sub>2</sub> O | 29                                    |
| 1-BuOH           | 171                                   |
| acetone          | 168                                   |
| DCM              | 10000                                 |
| MeOH             | 232                                   |
| EtOH             | 90                                    |
| Diethyl ether    | 10000                                 |

### Reaction #1

| Solvent                           | Composite score | Mass (kg) | Eco-impact contributions |
|-----------------------------------|-----------------|-----------|--------------------------|
| 1-BuOH (reaction)                 | 171             | 0.0405    | 6.92                     |
| acetone                           | 168             | 0.0237    | 3.98                     |
| 1-BuOH (wash)                     | 171             | 0.0081    | 1.38                     |
| MeOH (pre-chromatography)         | 232             | 0.0079    | 1.83                     |
| DCM (chromatography)              | 10000           | 0.29925   | 2992.5                   |
| MeOH (chromatography)             | 232             | 0.01975   | 4.582                    |
| <b>Total eco-impact = 3011.19</b> |                 |           |                          |

$$\text{Eco-impact/kg}_{\text{BuGal}} = \frac{3011.19}{0.000250 \text{ kg (product)}} = 12044760$$

### Reaction #2

| Solvent                           | Composite score | Mass (kg) | Eco-impact contributions |
|-----------------------------------|-----------------|-----------|--------------------------|
| 1-BuOH (reaction)                 | 171             | 0.0405    | 6.92                     |
| acetone                           | 168             | 0.0237    | 3.98                     |
| 1-BuOH (wash)                     | 171             | 0.0081    | 1.38                     |
| MeOH (pre-chromatography)         | 232             | 0.0079    | 1.83                     |
| DCM (chromatography)              | 10000           | 0.6284    | 6284                     |
| MeOH (chromatography)             | 232             | 0.0415    | 9.63                     |
| <b>Total eco-impact = 6307.74</b> |                 |           |                          |

$$\text{Eco-impact/kg}_{\text{BuGal}} = \frac{6307.74}{0.000525 \text{ kg (product)}} = 12014742.9$$

**Reaction #3**

| Solvent                           | Composite score | Mass (kg) | Eco-impact contributions |
|-----------------------------------|-----------------|-----------|--------------------------|
| 1-BuOH (reaction)                 | 171             | 0.0648    | 11.08                    |
| 1-BuOH (wash)                     | 171             | 0.0081    | 1.38                     |
| MeOH (pre-chromatography)         | 232             | 0.0079    | 1.83                     |
| DCM (chromatography)              | 10000           | 0.5805    | 5805                     |
| MeOH (chromatography)             | 232             | 0.0383    | 8.9                      |
| <b>Total eco-impact = 5828.19</b> |                 |           |                          |

$$\text{Eco-impact/kg}_{\text{BuGal}} = \frac{5828.19}{0.000485 \text{ kg (product)}} = 12016886.6$$

**Reaction #4**

| Solvent                                 | Composite score | Mass (kg) | Eco-impact contributions |
|-----------------------------------------|-----------------|-----------|--------------------------|
| 1-BuOH (reaction)                       | 171             | 0.0648    | 11.08                    |
| 1-BuOH (wash)                           | 171             | 0.0081    | 1.38                     |
| H <sub>2</sub> O (crude solubilization) | 29              | 0.02      | 0.58                     |
| EtOH (elution)                          | 90              | 0.03945   | 3.55                     |
| Diethyl ether (washing)                 | 10000           | 0.00356   | 35.6                     |
| <b>Total eco-impact = 52.19</b>         |                 |           |                          |

$$\text{Eco-impact/kg}_{\text{BuGal}} = \frac{52.19}{0.000587 \text{ kg (product)}} = 88909.7$$

**Reaction #5–#6**

| Solvent                                 | Composite score | Mass (kg) | Eco-impact contributions |
|-----------------------------------------|-----------------|-----------|--------------------------|
| 1-BuOH (reaction)                       | 171             | 0.648     | 110.81                   |
| 1-BuOH (washing)                        | 171             | 0.081     | 13.85                    |
| H <sub>2</sub> O (crude solubilization) | 29              | 0.05      | 1.45                     |
| EtOH (elution)                          | 90              | 0.197     | 17.75                    |
| Diethyl ether (washing)                 | 10000           | 0.0356    | 356.5                    |
| <b>Total eco-impact = 500.36</b>        |                 |           |                          |

$$\text{Eco-impact/kg}_{\text{BuGal}} = \frac{500.36}{0.0044 \text{ kg (product)}} = 113718.2$$

**Reaction #7**

| Solvent                                 | Composite score | Mass (kg) | Eco-impact contributions |
|-----------------------------------------|-----------------|-----------|--------------------------|
| 1-BuOH (reaction)                       | 171             | 0.972     | 166.2                    |
| 1-BuOH (washing)                        | 171             | 0.202     | 34.63                    |
| H <sub>2</sub> O (crude solubilization) | 29              | 0.05      | 1.45                     |
| EtOH (elution)                          | 90              | 0.237     | 21.33                    |
| Diethyl ether (washing)                 | 10000           | 0.0356    | 356                      |
| <b>Total eco-impact = 579.61</b>        |                 |           |                          |

$$\text{Eco-impact/kg}_{\text{BuGal}} = \frac{579.61}{0.0036 \text{ kg (product)}} = 161002.8$$

### Reaction #8–#9

| Solvent                                 | Composite score | Mass (kg) | Eco-impact contributions |
|-----------------------------------------|-----------------|-----------|--------------------------|
| 1-BuOH (reaction)                       | 171             | 0.648     | 110.8                    |
| 1-BuOH (washing)                        | 171             | 0.081     | 13.8                     |
| H <sub>2</sub> O (crude solubilization) | 29              | 0.05      | 1.45                     |
| 1-BuOH (elution)                        | 171             | 0.2227    | 38.09                    |
| Diethyl ether (washing)                 | 10000           | 0.0356    | 356                      |
| <b>Total eco-impact = 520.14</b>        |                 |           |                          |

$$\text{Eco-impact/kg}_{\text{BuGal}} = \frac{520.14}{0.0025 \text{ kg (product)}} = 208056$$

### References

- 1 R. Semproli, L. Cassano, G. Ballabio, G. Cappelletti, G. Speranza, S. Donzella, C. Compagno, D. Ubiali and M. S. Robescu, *Appl. Microbiol. Biotechnol.*, 2025, **109**, 270.
- 2 P. Dominguez de María, *Curr. Opin. Green Sustain. Chem.*, 2025, **52**, 101003.
- 3 M. Ferrara, F. DellaNegra and M. Verzini, *Org. Process Res. Dev.*, 2025, **29**, 1110–1124.
